# Supplementary material for: Prevalence of Cancer Predisposition Germline Variants in Male Breast Cancer Patients: Results of the German Consortium for Hereditary Breast and Ovarian Cancer
Source: MDPI journal article supplement (doi:10.3390/cancers14133292), 2022-07-05
Supplement: s1 [file s1]

Supplementary

# Prevalence of cancer predisposition germline variants in male breast cancer patients: Results of the German Consortium for Hereditary Breast and Ovarian Cancer

**Table S1.** Pathogenic variants (PVs) in non-BRCA1/2 genes detected in 32/340 mBC patients. AAD = age at first diagnosis, CNV = copy number variation, PTV = protein truncating variant, mBC = male breast cancer.

| Gene                      | exon/<br>intron<br>location | c.DNA position      | HGVS (protein)    | mutation<br>class | mutation<br>type | AAD | BC/OC<br>family<br>history |
|---------------------------|-----------------------------|---------------------|-------------------|-------------------|------------------|-----|----------------------------|
| <i>ATM</i>                | exon 40                     | c.5932G>T           | p.Glu1978*        | class 5           | PTV              | 52  | Yes                        |
| <i>ATM</i>                | exon 50                     | c.7327C>T           | p.Arg2443*        | class 5           | PTV              | 65  | Yes                        |
| <i>ATM</i>                | exon 60                     | c.8690del           | p.Gly2897Alafs*41 | class 5           | PTV              | 42  | Yes                        |
| <i>ATM</i>                | exon 61                     | c.8793T>A           | p.Cys2931*        | class 5           | PTV              | 43  | Yes                        |
| <i>ATM</i> <sup>1</sup>   | /                           | whole gene deletion | p.?               | class 5           | CNV              | 37  | No                         |
| <i>BRIP1</i>              | exon 16                     | c.2273dup           | p.Ala759Serfs*6   | class 5           | PTV              | 57  | Yes                        |
| <i>CDH1</i>               | exon 8                      | c.1131delC          | p.Thr378Profs*15  | class 5           | PTV              | 70  | Yes                        |
| <i>CHEK2</i>              | exon 3                      | c.349A>G            | p.Arg117Gly       | class 4           | MISSENSE         | 49  | Yes                        |
| <i>CHEK2</i>              | intron 6                    | c.792+2T>C          | p.?               | class 4           | PTV              | 30  | No                         |
| <i>CHEK2</i>              | exon 9/10                   | deletion exon 9/10  | p.?               |                   | CNV              | 72  | No                         |
| <i>CHEK2</i>              | exon 11                     | c.1100delC          | p.Thr367Metfs*15  | class 5           | PTV              | 72  | Yes                        |
| <i>CHEK2</i>              | exon 11                     | c.1100delC          | p.Thr367Metfs*15  | class 5           | PTV              | 47  | Yes                        |
| <i>CHEK2</i>              | exon 11                     | c.1100delC          | p.Thr367Metfs*15  | class 5           | PTV              | 45  | Yes                        |
| <i>CHEK2</i>              | exon 11                     | c.1100delC          | p.Thr367Metfs*15  | class 5           | PTV              | 73  | Yes                        |
| <i>CHEK2</i>              | exon 11                     | c.1100delC          | p.Thr367Metfs*15  | class 5           | PTV              | 58  | Yes                        |
| <i>CHEK2</i>              | exon 11                     | c.1100delC          | p.Thr367Metfs*15  | class 5           | PTV              | 83  | No                         |
| <i>CHEK2</i>              | exon 11                     | c.1169A>C           | p.Tyr390Ser       | class 4           | MISSENSE         | 58  | Yes                        |
| <i>CHEK2</i> <sup>1</sup> | exon 11                     | c.1238T>G           | p.Leu413*         | class 5           | PTV              | 37  | No                         |
| <i>FANCM</i>              | exon 14                     | c.3979_3980delCA    | p.Gln1327Valfs*16 | class 5           | PTV              | 49  | No                         |
| <i>FANCM</i>              | exon 20                     | c.5101C>T           | p.Gln1701*        | class 5           | PTV              | 73  | No                         |
| <i>MUTYH</i>              | exon 7                      | c.536A>G            | p.Tyr179Cys       | class 5           | MISSENSE         | 63  | No                         |
| <i>MUTYH</i>              | exon 13                     | c.1187G>A           | p.Gly396Asp       | class 4           | MISSENSE         | 60  | Yes                        |
| <i>MUTYH</i>              | exon 13                     | c.1187G>A           | p.Gly396Asp       | class 4           | MISSENSE         | 64  | Yes                        |
| <i>NBN</i> <sup>2</sup>   | intron 8                    | c.995-2A>G          |                   | class 4           | PTV              | 40  | No                         |
| <i>PALB2</i>              | exon 2                      | c.50T>G             | p.Leu17*          | class 5           | PTV              | 71  | Yes                        |
| <i>PALB2</i>              | exon 3                      | c.172_175delTTGT    | p.Gln60Argfs*7    | class 5           | PTV              | 56  | No                         |
| <i>PALB2</i>              | exon 3                      | c.172_175delTTGT    | p.Gln60Argfs*7    | class 5           | PTV              | 49  | Yes                        |
| <i>PALB2</i>              | exon 4                      | c.509_510delGA      | p.Arg170Ilefs*14  | class 5           | PTV              | 60  | Yes                        |
| <i>PALB2</i> <sup>3</sup> | exon 4                      | c.886dup            | p.Met296Asnfs*7   | class 5           | PTV              | 68  | Yes                        |
| <i>PALB2</i>              | exon 4                      | c.1597_1603dup      | p.Ser535Asnfs*3   | class 5           | PTV              | 78  | Yes                        |
| <i>PMS2</i>               | exon 13                     | c.2249G>A           | p.Gly750Asp       | class 4           | MISSENSE         | 66  | Yes                        |
| <i>PTEN</i>               | exon 7                      | c.697C>T            | p.Arg233*         | class 4           | PTV              | 57  | No                         |
| <i>RAD50</i> <sup>2</sup> | exon 4                      | c.541dup            | p.Ser181Phefs*7   | class 4           | PTV              | 40  | No                         |
| <i>RAD51C</i>             | intron 6                    | c.905-2_905-1delAG  | p.?               | class 4           | PTV              | 51  | Yes                        |
| <i>TP53</i> <sup>3</sup>  | exon 8                      | c.836G>A            | p.Gly279Glu       | class 4           | MISSENSE         | 68  | Yes                        |

<sup>1</sup>Double mutation carrier: *CHEK2/ATM* deletion (CNV)

<sup>2</sup>Double mutation carrier: *NBN/ RAD50*.

<sup>3</sup>Double mutation carrier: *PALB2/TP53*.

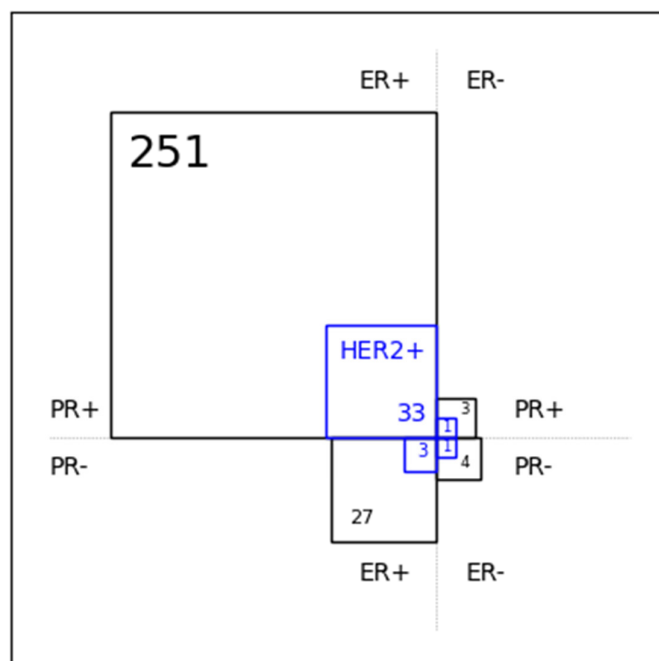

**Figure S1.** Venn diagram of hormone receptor status of 323 individuals with male breast cancer. ER+/-: Estrogen receptor positive/negative. PR+/-: Progesterone receptor positive/negative. HER2 +/-: human epidermal growth factor receptor 2 positive/negative.

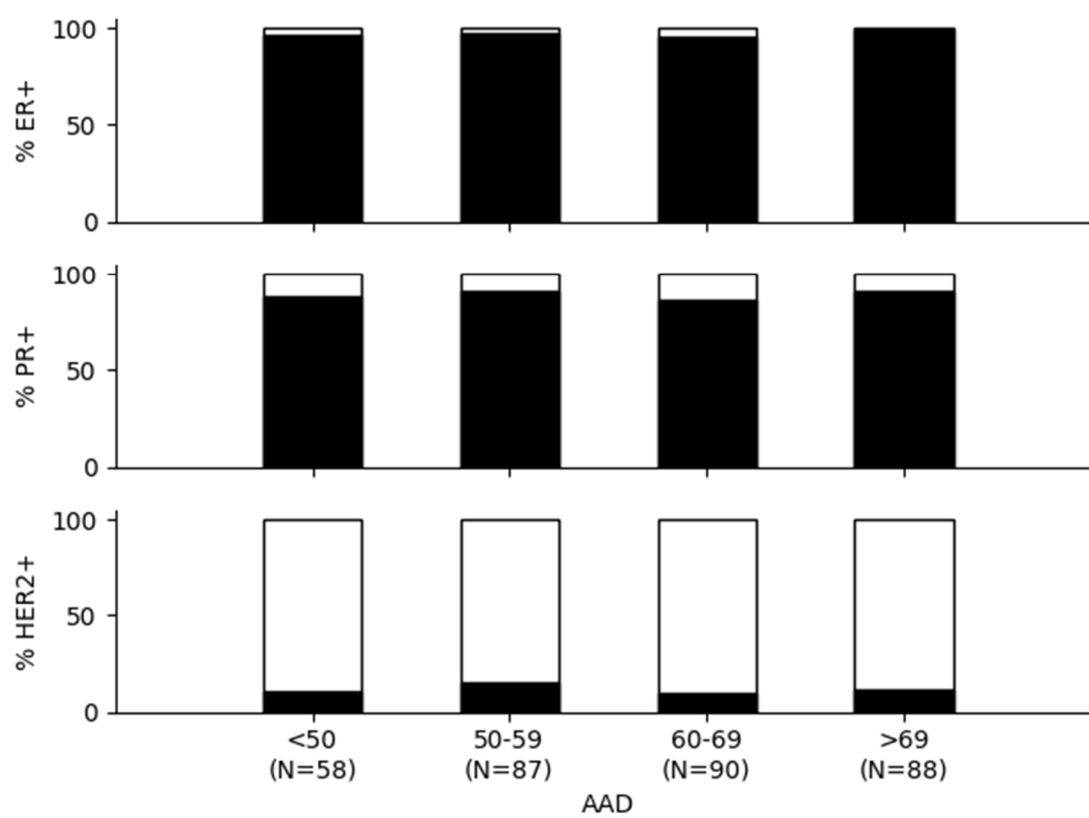

**Figure S2.** Proportion of hormone receptor-positive tumors per age at first diagnosis (AAD) in 323 mBC patients. ER+: Estrogen receptor positive. PR+: Progesterone receptor positive. HER2+: human epidermal growth factor receptor 2 positive.

**Table S2.** Binary logistic regression analyses with tumor receptor status as the outcome (1 := positive; 0 := negative) for 323 individuals with male breast cancer. Gene-wise covariates refer to pathogenic variant carrier status (1 := carrier; 0 := non-carrier). CI = confidence interval. SE = standard error.

| <b>Estrogen receptor status</b>                 | <b><math>\beta</math> (95%CI)</b> | <b>SE</b>        | <b>p</b> |
|-------------------------------------------------|-----------------------------------|------------------|----------|
| Age at diagnosis (years)                        | 0.01 (-0.04 – 0.07)               | 0.03             | 0.61     |
| <i>BRCA1</i>                                    | 15.23 (-128 – inf)                | >10 <sup>3</sup> | 0.99     |
| <i>BRCA2</i>                                    | 0.94 (-0.78 – 3.87)               | 1.07             | 0.38     |
| <b>Progesterone receptor status</b>             | <b><math>\beta</math> (95%CI)</b> | <b>SE</b>        | <b>p</b> |
| Age at diagnosis (years)                        | 0.001 (-0.03 – 0.03)              | 0.02             | 0.93     |
| <i>BRCA1</i>                                    | -0.82 (-2.06 – 0.71)              | 0.68             | 0.23     |
| <i>BRCA2</i>                                    | -0.22 (-1.01 – 0.65)              | 0.42             | 0.60     |
| <b>Human epidermal growth factor receptor 2</b> | <b><math>\beta</math> (95%CI)</b> | <b>SE</b>        | <b>p</b> |
| Age at diagnosis (years)                        | -0.004 ()                         | 0.02             | 0.77     |
| <i>BRCA1</i>                                    | 0.24                              | 0.79             | 0.76     |
| <i>BRCA2</i>                                    | 0.36                              | 0.39             | 0.35     |
